# Supplementary material for: MCA: Multiresolution Correlation Analysis, a graphical tool for subpopulation identification in single-cell gene expression data
Source: Springer Nature journal article supplement (doi:10.1186/1471-2105-15-240), 2014-07-11

**A**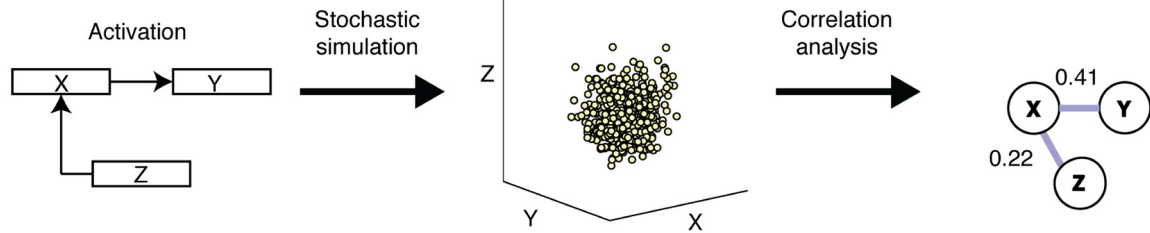**B**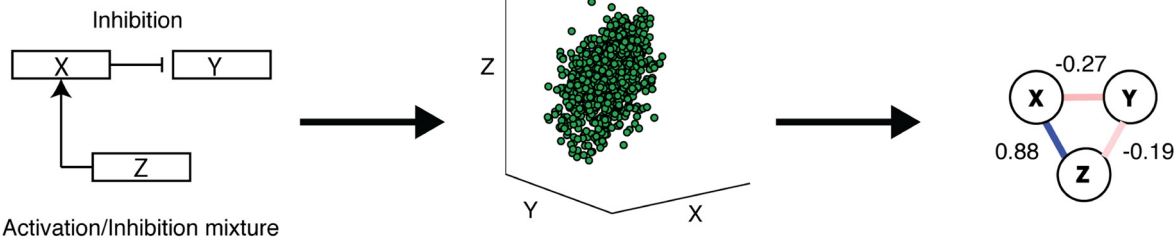

Activation/Inhibition mixture

**C**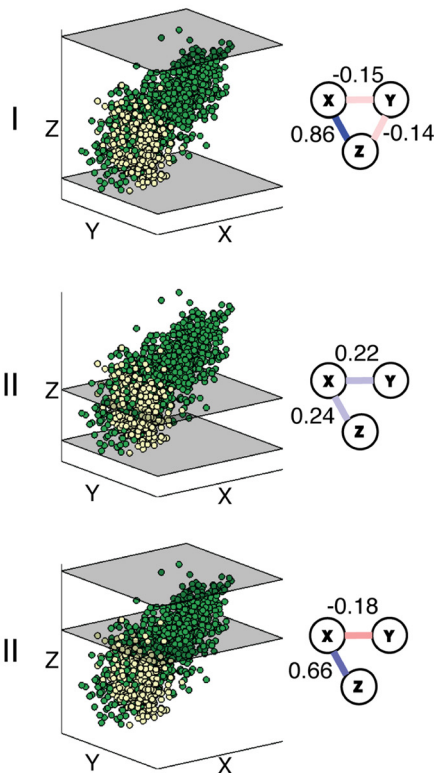**D**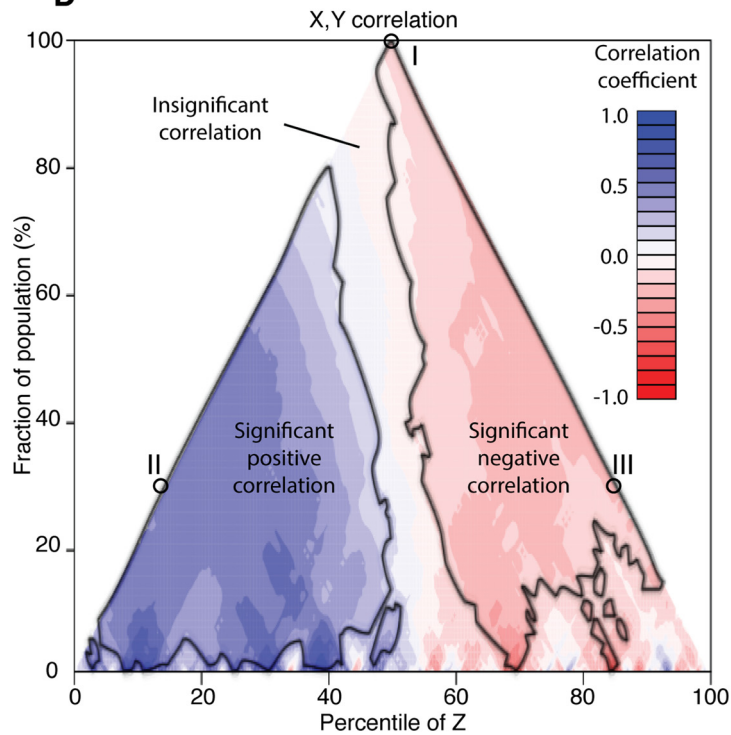

Supplement: 12859_2014_6843_MOESM1_ESM.pdf [file 12859_2014_6843_MOESM1_ESM.pdf]
