# Supplementary material for: MCA: Multiresolution Correlation Analysis, a graphical tool for subpopulation identification in single-cell gene expression data
Source: Springer Nature journal article supplement (doi:10.1186/1471-2105-15-240), 2014-07-11

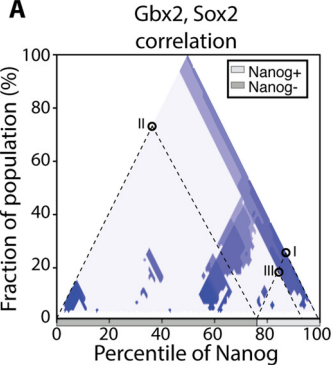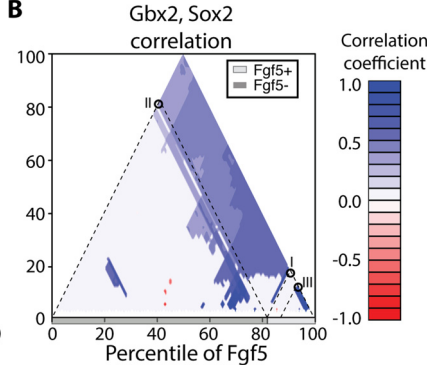

Supplement: 12859_2014_6843_MOESM3_ESM.pdf [file 12859_2014_6843_MOESM3_ESM.pdf]
